# Supplementary material
Source: PubMed Central journal article supplement (PMC8891041)
Supplement: NIHMS1750141-supplement-Supplementary_Figures.pdf [file NIHMS1750141-supplement-Supplementary_Figures.pdf]

**Supplementary Table 1. List of initially screened computationally identified lead compounds as PTHR ligands.** Indicated are predicted computed binding scores, and area under the curve (A.U.C.) of cAMP time courses induced by 1 nM PTH in the presence of 10  $\mu$ M of small molecules (mean  $\pm$  S.D. of *N* independent experiments), normalized to the PTH response without compounds and expressed as % values. In brackets is alternative nomenclature used in Source Data Files.

| Compound    | MolPort ID  | score  | Integrated cAMP |             | N |
|-------------|-------------|--------|-----------------|-------------|---|
|             |             |        | (mean           | $\pm$ s.d.) |   |
| 1 (Pitt8)   | 002-583-206 | -8.41  | 32.3            | $\pm$ 9.5   | 3 |
| 2 (Pitt12)  | 039-313-655 | -8.47  | 39.4            | $\pm$ 10.6  | 3 |
| 3 (Pitt1)   | 000-837-761 | -8.16  | 82.7            | $\pm$ 10.0  | 2 |
| 4 (Pitt2)   | 000-749-199 | -9.28  | 72.4            | $\pm$ 8.1   | 2 |
| 5 (Pitt3)   | 002-764-247 | -8.24  | 50.6            | $\pm$ 10.2  | 2 |
| 6 (Pitt4)   | 019-692-354 | -8.23  | 118.8           | $\pm$ 8.9   | 2 |
| 7 (Pitt5)   | 006-815-377 | -8.62  | 79.6            | $\pm$ 8.9   | 2 |
| 8 (Pitt6)   | 002-582-026 | -8.17  | 64.9            | $\pm$ 7.5   | 2 |
| 9 (Pitt7)   | 002-527-649 | -8.31  | 70.3            | $\pm$ 6.3   | 2 |
| 10 (Pitt9)  | 000-829-806 | -8.21  | 85.3            | $\pm$ 14.3  | 2 |
| 11 (Pitt10) | 028-805-319 | -8.33  | 92.5            | $\pm$ 12.0  | 2 |
| 12 (Pitt11) | 016-916-811 | -8.38  | 106.2           | $\pm$ 12.9  | 2 |
| 13 (Pitt13) | 030-037-643 | -8.42  | 96.1            | $\pm$ 10.9  | 2 |
| 14 (Pitt14) | 003-269-448 | -8.39  | 137.2           | $\pm$ 5.9   | 2 |
| 15 (Pitt15) | 023-186-594 | -8.33  | 41.9            | $\pm$ 18.9  | 2 |
| 16 (Pitt16) | 010-715-401 | -8.28  | 76.7            | $\pm$ 12.8  | 2 |
| 17 (Pitt17) | 010-715-395 | -8.33  | 99.9            | $\pm$ 9.2   | 2 |
| 18 (Pitt18) | 010-807-325 | -8.5   | 71.1            | $\pm$ 10.9  | 2 |
| 19 (Pitt19) | 010-807-350 | -8.5   | 75.0            | $\pm$ 7.7   | 2 |
| 20 (Pitt20) | 002-369-638 | -9.33  | 63.5            | $\pm$ 14.3  | 2 |
| 21 (Pitt21) | 005-944-940 | -8.54  | 62.0            | $\pm$ 5.5   | 2 |
| 22 (Pitt22) | 021-757-743 | -8.92  | 73.6            | $\pm$ 9.3   | 2 |
| 23 (Pitt23) | 020-207-515 | -8.61  | 111.2           | $\pm$ 10.7  | 2 |
| 24 (Pitt24) | 020-198-951 | -8.80  | 117.2           | $\pm$ 7.5   | 2 |
| 25 (Pitt25) | 005-011-602 | -8.40  | 119.1           | $\pm$ 11.6  | 2 |
| 26 (Pitt26) | 002-284-377 | -7.19  | 81.6            | $\pm$ 2.9   | 2 |
| 27 (Pitt27) | 002-169-278 | -7.71  | 100.9           | $\pm$ 11.2  | 2 |
| 28 (Pitt28) | 007-831-482 | -10.39 | 152.0           | $\pm$ 7.9   | 2 |
| 29 (Pitt29) | 006-598-622 | -9.74  | 135.2           | $\pm$ 4.8   | 2 |
| 30 (Pitt30) | 010-693-446 | -8.85  | 140.4           | $\pm$ 7.0   | 2 |

**Supplementary Table 2. Detailed chemical properties of hit compounds.**

| Compound | Structure                                                                           | SMILES                                                                                 | Molecular weight | LogP  |
|----------|-------------------------------------------------------------------------------------|----------------------------------------------------------------------------------------|------------------|-------|
| 1        | 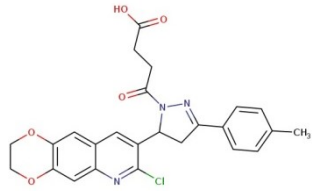   | <chem>Cc1ccc(cc1)C1=NN(C(C1)c1cc2cc3OCCOc3cc2nc1Cl)C(=O)CC(=O)O</chem>                 | 479.92           | 4.51  |
| 2        |    | <chem>COc1ccc(cc1)[C@@H]1CN(C[C@@H]1C(O)=O)C(=O)OCC1c2ccc(cc2-c2ccccc12</chem>         | 443.499          | 4.744 |
| 3        |    | <chem>[O-][N+](=O)c1cccc(c1)C1N2[C@H](Cc3c1[nH]c1cccc31)C(=O)N(Cc1ccccc1)CC2=O</chem>  | 467.485          | 3.356 |
| 4        |   | <chem>[O-][N+](=O)c1cccc(c1)N1C(=O)C2C(C3N(N=Cc4ccccc34)C2C(=O)c2ccc(F)cc2)C1=O</chem> | 484.443          | 3.495 |
| 5        |  | <chem>Cc1ccc(cc1C)-c1cc(-c2ccc(C)(C)c2)n(Cn2ccc(n2)[N+](O-)=O)n1</chem>                | 401.47           | 5.061 |
| 6        |  | <chem>COc1ccc(cc1)C1CC(=NN1C(=O)CN=[N+]=[N-])c1cccc2ccccc12</chem>                     | 385.427          | 4.836 |
| 7        |  | <chem>CC(=O)Nc1ccc2c(c[nH]c2c1)C(N1CCN(CC1)c1cc(C)c2ccccc2n1)C(=O)O</chem>             | 457.534          | 4.58  |

|    |  |                                                                                                    |         |       |
|----|--|----------------------------------------------------------------------------------------------------|---------|-------|
| 8  |  | <chem>[O-][N+](=O)c1cccc(c1)C(=O)[C@@H]1[C@H]2[C@@H](C3N1C=Cc1cccc31)C(=O)N(C2=O)c1ccc(F)c1</chem> | 483.455 | 4.132 |
| 9  |  | <chem>Cc1ccc2c(NC(=O)C22NC(CCC(O)=O)[C@@H]3[C@H]2C(=O)N(Cc2ccccc2Cl)C3=O)c1C</chem>                | 481.93  | 2.742 |
| 10 |  | <chem>COc1cccc1CN1CC(=O)N2[C@H](Cc3c([nH]c4ccccc34)C2c2ccc(c2)[N+](O-)=O)C1=O</chem>               | 496.523 | 3.97  |
| 11 |  | <chem>Cc1ccc(c1)C1CC(=NN1C(=O)CC(O)=O)c1c(C)nc2ccccc2c1-c1cccc1</chem>                             | 477.564 | 6.061 |
| 12 |  | <chem>CN(CC(=O)N1N=C(CC1c1cccc(c1)[N+](O-)=O)c1ccc(F)cc1)C(=O)c1cccc(F)c1</chem>                   | 478.456 | 4.323 |
| 13 |  | <chem>CCOc1cccc2cc(C3CC(=NN3C(=O)CCC(O)=O)c3ccc(C)cc3)c(Cl)nc12</chem>                             | 465.93  | 5.138 |
| 14 |  | <chem>CC1CCCN(C1)S(=O)(=O)c1ccc(N2CCC(CC2)C(=O)N2CCCCC2)c(c1)[N+](O-)=O</chem>                     | 492.64  | 3.634 |
| 15 |  | <chem>COc1ccc2nc(Cl)c(cc2c1)C1CC(=NN1C(=O)CCC(O)=O)c1ccc(F)c1</chem>                               | 455.87  | 4.578 |

|    |  |                                                                                                                     |         |       |
|----|--|---------------------------------------------------------------------------------------------------------------------|---------|-------|
| 16 |  | <chem>OC(=O)c1cc(NS(=O)(=O)c2ccc(F)c(F)c2)ccc1N1CCN(CC1)c1cc(F)c(F)c1</chem>                                        | 491.49  | 3.93  |
| 17 |  | <chem>CCc1ccc(cc1)S(=O)(=O)Nc1ccc(N2CCN(CC2)c2ccc(F)cc2)c(c1)C(O)=O</chem>                                          | 483.56  | 4.214 |
| 18 |  | <chem>OC(=O)c1ccc(N2CCCN(CC2)c2ccc(Cl)nn2)c(NC(=O)c2ccc(Cl)c2)c1</chem>                                             | 486.35  | 4.451 |
| 19 |  | <chem>OC(=O)c1ccc(N2CCCN(CC2)c2ccc(Cl)nn2)c(NC(=O)c2ccc(F)cc2)c1</chem>                                             | 469.9   | 3.936 |
| 20 |  | <chem>Cc1ccc(cc1)C1=NN(C(C1)c1cn(nc1-c1ccc(C)cc1)-c1ccccc1)C(=O)CCC(O)=O</chem>                                     | 492.579 | 5.699 |
| 21 |  | <chem>CC1(C)CC[C@@]2(CC[C@@]3(C)C(=CCC4[C@@]5(C)C[C@@H](O)[C@H](O)C(C)(C)C5CC[C@@]34C)[C@@H]2[C@@H]1O)C(O)=O</chem> | 488.709 | 5.175 |
| 22 |  | <chem>Cc1c(-c2cc(NCc3ccnc3)nc3[nH]ccc23)c(=O)[nH]c2ccccc12</chem>                                                   | 381.439 | 4.387 |
| 23 |  | <chem>COCCNc1cc(-c2ccc3c(c2)[nH]c2c3n[nH]c2=O)c2cc[nH]c2n1</chem>                                                   | 374.404 | 3.006 |
| 24 |  | <chem>Nc1nc(cc(-c2ccc(O)c(O)c2)c1C#N)-c1cc(F)cc(c1)C(F)(F)F</chem>                                                  | 389.31  | 4.439 |

|    |                                                                                     |                                                                                |         |       |
|----|-------------------------------------------------------------------------------------|--------------------------------------------------------------------------------|---------|-------|
| 25 | 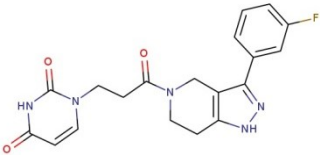   | <chem>Fc1cccc(c1)-c1n[nH]c2CCN(Cc12)C(=O)CCn1ccc(=O)[nH]c1=O</chem>            | 383.383 | 1.041 |
| 26 |    | <chem>Cc1cc(\C=C(/C#N)c2nc3ccccc3[nH]2)c(C)n1-c1sc(C)c(C)c1C(O)=O</chem>       | 416.5   | 5.411 |
| 27 |    | <chem>[O-][N+](=O)c1cccc(\C=C2/CCCC3C(NN=C23)c2cccc(c2)[N+](=[O-])=O)c1</chem> | 378.388 | 4.387 |
| 28 |    | <chem>Cc1n(nc2c(nnc(C)c12)N1CCN(C1)C(=O)Nc1cc(C)cc(C)c1)-c1ccc(C)cc1</chem>    | 469.593 | 4.712 |
| 29 |   | <chem>Cc1cccc(c1)C1N(CCc2ccc(OCc3nc(co3)C(=O)NC3CC3)cc12)C(=O)c1ccc1</chem>    | 497.551 | 4.835 |
| 30 |  | <chem>CCC(=O)Nc1cccc(c1)-c1noc(n1)C1CCCN(C1)C(=O)c1cc2ccccc2[nH]1</chem>       | 443.507 | 4.586 |

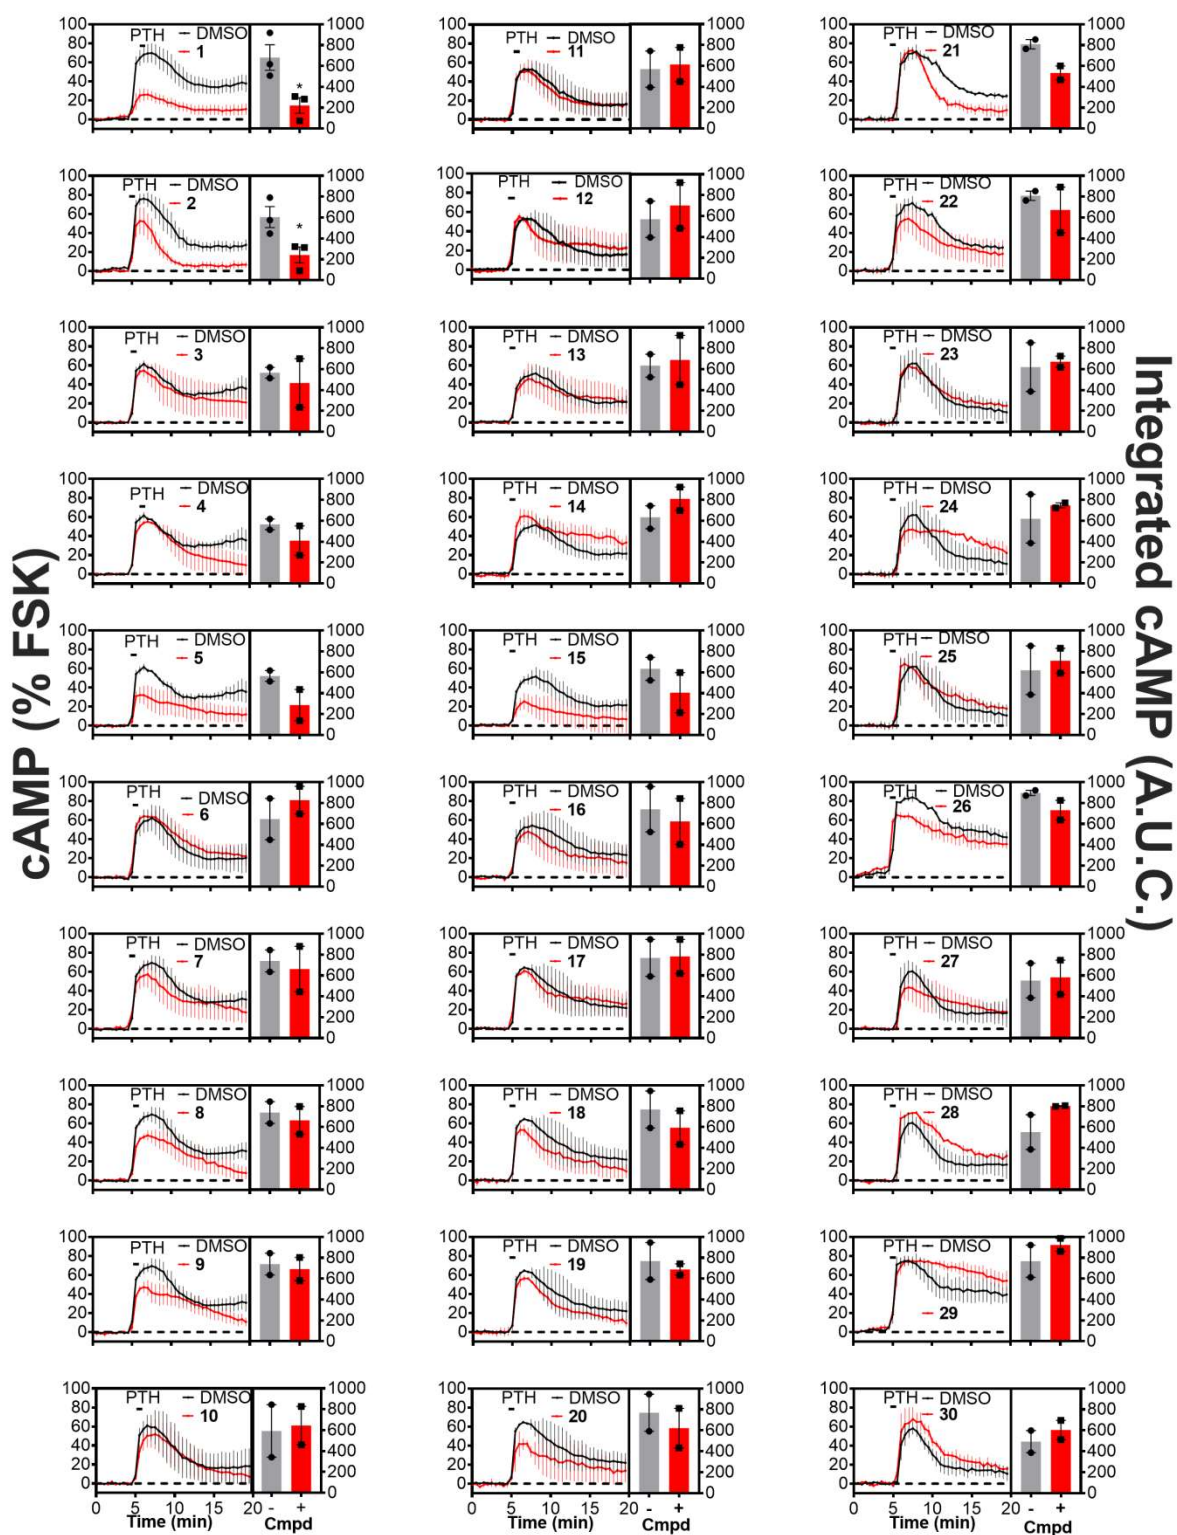

**Supplementary Figure 1. Effect of computationally identified small molecules on PTH-induced cAMP production.** Averaged cAMP time-courses following brief stimulation with 1 nM PTH<sub>1-34</sub> without (*black*) or with (*red*) 10 μM corresponding compounds measured by FRET changes from HEK293 cells stably expressing the recombinant human PTHR. The bars graph represents the area under the curve (AUC) of cAMP time-courses. Data were normalized to the maximal forskolin induced cAMP response, which is set to 100%. Error bars represent the mean values ± s.d. of  $N = 3$  (Pitt8 and Pitt12) or  $N = 2$  (all the rest compounds) independent experiments.

**a** Multi-plate Glo-sensor assay

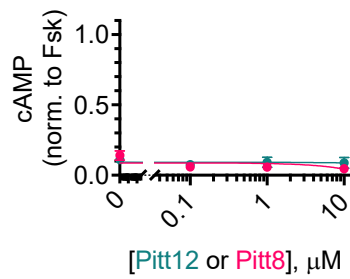

**b**

Single cell FRET-based assay

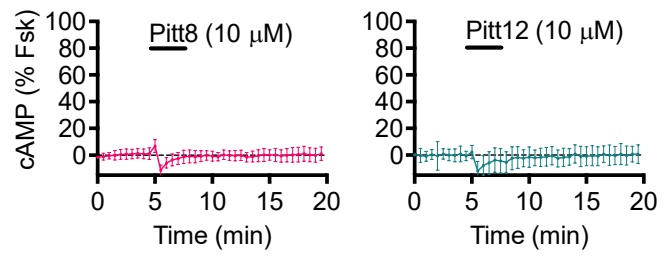

**Supplementary Figure 2. Basal cAMP controls.** (a, b) Effects of Pitt8 and Pitt12 on Fsk-mediated cAMP in HEK-293 cells recorded via either the Glo-sensor (a) or FRET (b) assays. Mean  $\pm$  s.d. of  $N = 4$  (Pitt12), and 3 (Pitt8) experiments carried out in duplicate for (a), and  $N = 3$  experiments for (b).

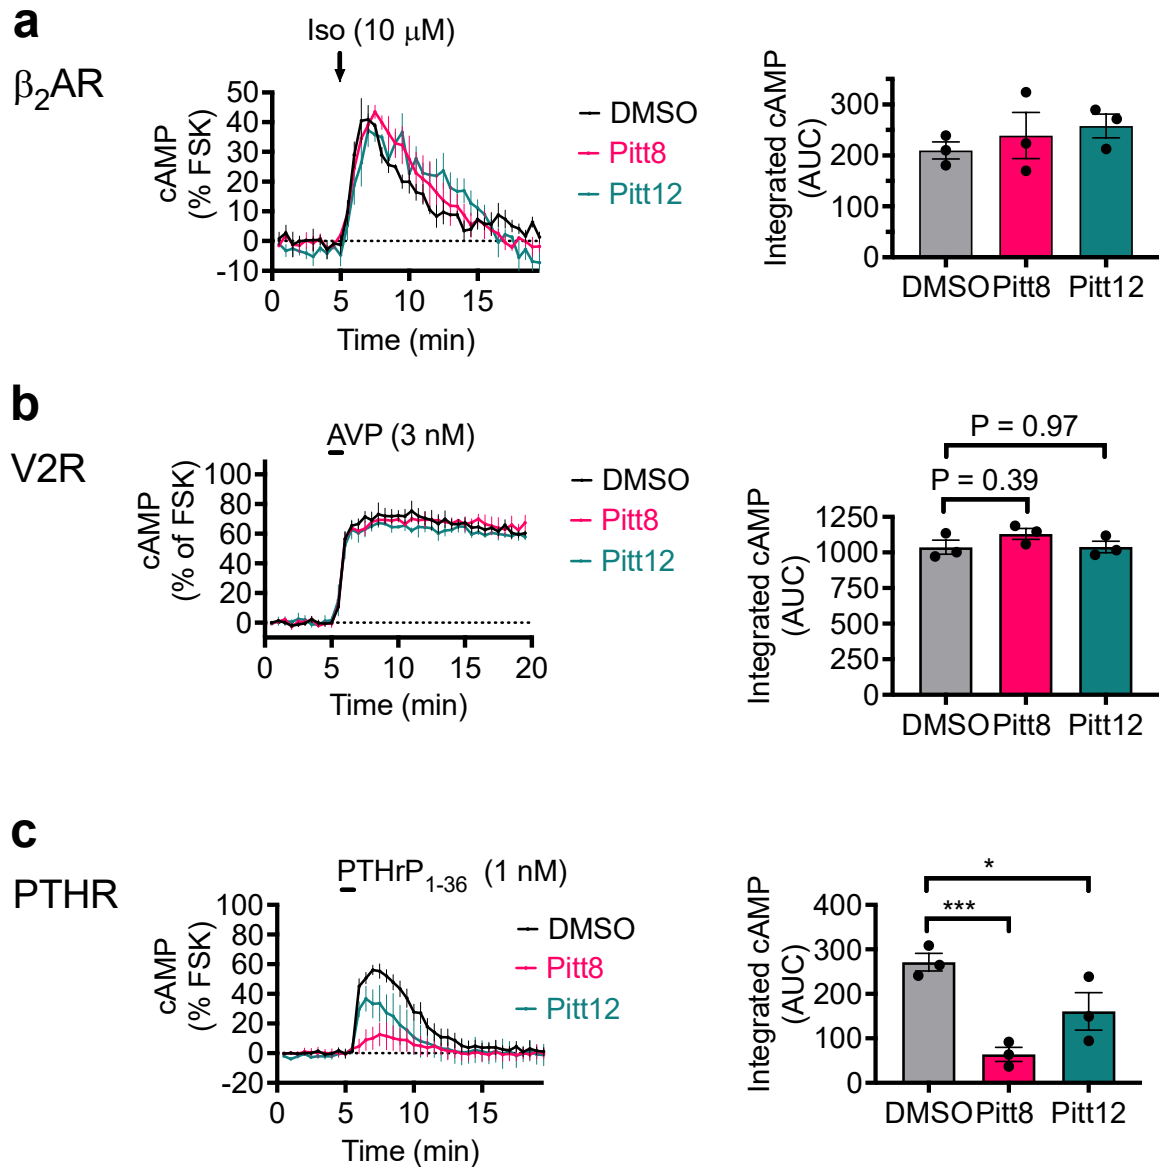

**Supplementary Figure 3. Selectivity of compounds.** (a–c) Averaged cAMP time-courses following brief stimulation with either isoproterenol (Iso), vasopressin (AVP) or PTHrP<sub>1-36</sub> without (*black*) or with (*colored*) 10  $\mu$ M compounds measured by FRET changes from HEK293 cells expressing the  $\beta_2$ -adrenergic receptor ( $\beta_2$ AR, panel a), a HA-tagged vasopressin type 2 receptor (V2R, panel b), or the PTHR (panel c) and a FRET-based cAMP sensor Epac<sup>CFP/YFP</sup>. Bars represent the corresponding quantitation of cAMP responses by measuring the area under the curve (A.U.C.) from 0 to 20 min. Data are the mean  $\pm$  s.e.m. of  $N = 3$  independent experiments with  $n = 16$  (DMSO), 21 (Pitt8), 16 (Pitt12) cells examined in panel a,  $n = 41$  (DMSO), 29 (Pitt8), 36 (Pitt12) cells examined in panel b, and  $n = 54$  (DMSO), 49 (Pitt8), 48 (Pitt12) cells examined in panel c.  $P$  values were assessed by two-tailed Student's  $t$ -test and are  $*P = 0.037$ ,  $***P = 0.012$ .



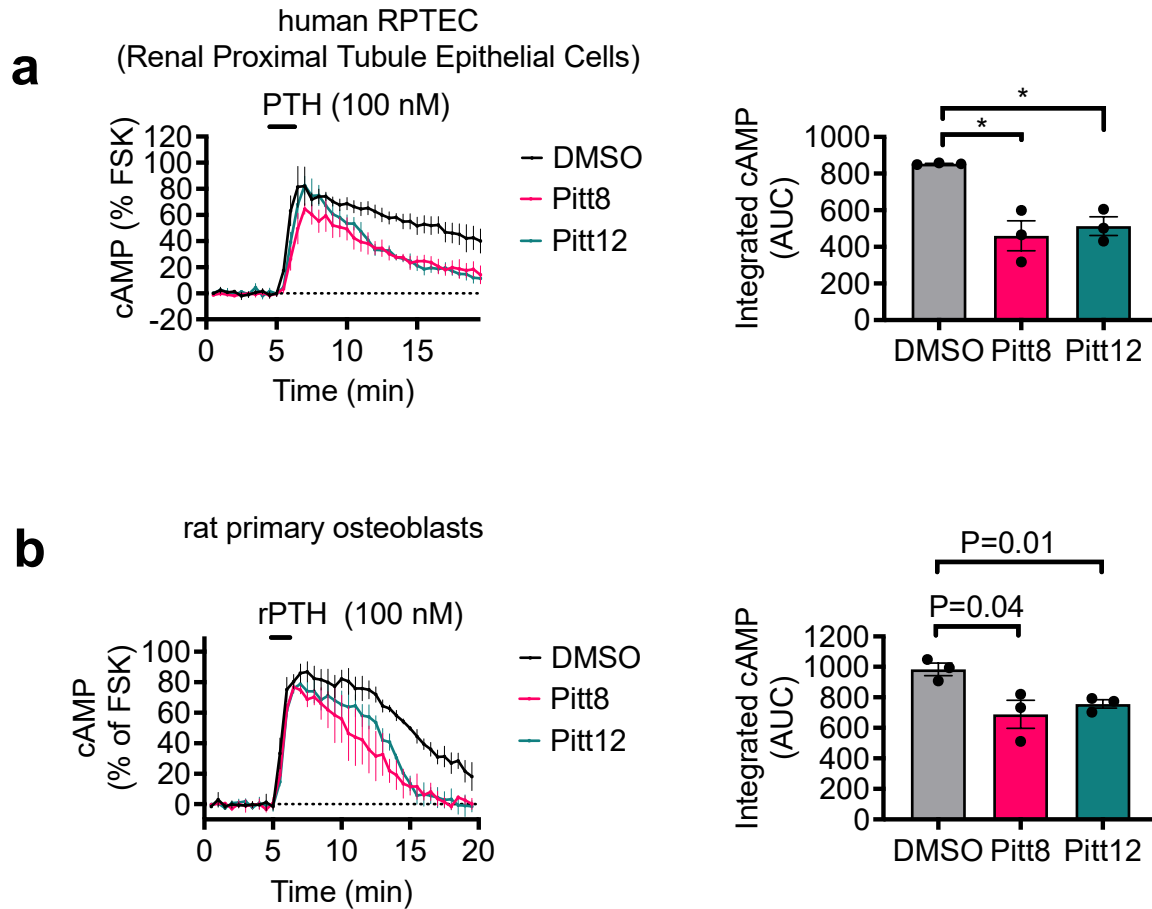

**Supplementary Figure 4. Effect of Selected Pitt molecules on native PTHR.** (a, b) Averaged cAMP time-courses following brief stimulation with PTH<sub>1-34</sub> without (*black*) or with (*colored*) 10  $\mu$ M Pitt molecules measured by FRET changes from RPTEC (a) or osteoblasts (b) expressing the FRET-based cAMP sensor Epac<sup>CFP/YFP</sup>. Bars represent the corresponding quantitation of cAMP responses by measuring the area under the curve (A.U.C.) from 0 to 20 min. Data are the mean  $\pm$  s.e.m. of  $N = 3$  independent experiments with  $n = 29$  (DMSO), 44 (Pitt8) and 33 (Pitt12) cells examined in panel a, and  $n = 23$  (DMSO), 26 (Pitt8) and 26 (Pitt12) cells examined in panel b.  $P$  values were assessed by Paired two-tailed Student's  $t$ -test and are  $*P=0.041$  (Pitt8) and  $*P=0.023$  (Pitt12).

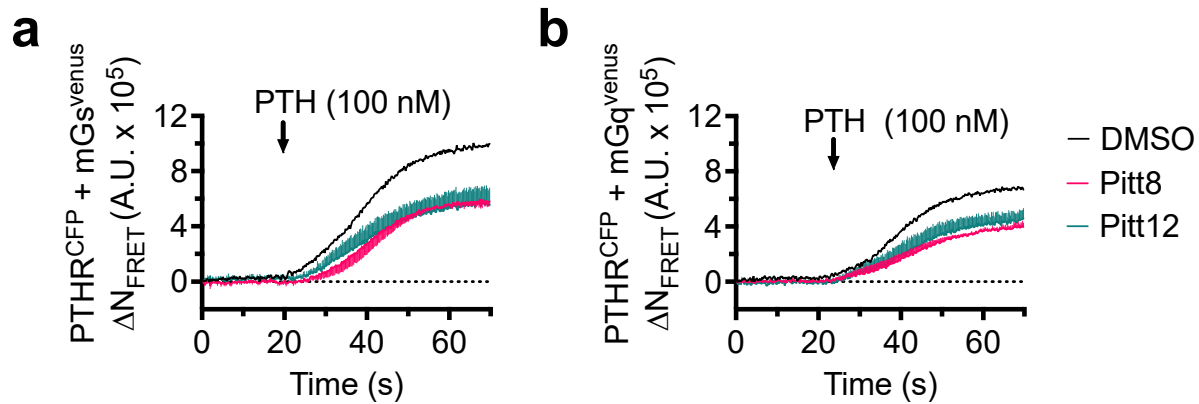

**Supplementary Figure 5. Effect of small molecules on G-protein coupling to PTHR.** (a, b) Time-course recorded by single cell FRET assay in HEK-293 cells expressing PTHR-CFP and mini-G proteins mGs-YFP (a) or mGq-YFP (b) in response to PTH  $\pm$  the indicated Pitt molecule. Mean  $\pm$  s.e.m. of  $N = 3$  experiments.
